# Supplementary material for: Unlocking the Potential of Circulating miRNAs in the Breast Cancer Neoadjuvant Setting: A Systematic Review and Meta-Analysis
Source: MDPI journal article supplement (doi:10.3390/cancers15133424), 2023-06-30
Supplement: s1 [file s1]

| Domain                                       | Key items                                                                                                                                                                                                                                                         | Reported on page # |
|----------------------------------------------|-------------------------------------------------------------------------------------------------------------------------------------------------------------------------------------------------------------------------------------------------------------------|--------------------|
| <b>SOURCE OF DATA</b>                        | Source of data (e.g., cohort, case-control, randomized trial participants, or registry data)                                                                                                                                                                      |                    |
| <b>PARTICIPANTS</b>                          | Participant eligibility and recruitment method (e.g., consecutive participants, location, number of centers, setting, inclusion and exclusion criteria)                                                                                                           |                    |
|                                              | Participant description                                                                                                                                                                                                                                           |                    |
|                                              | Details of treatments received, if relevant                                                                                                                                                                                                                       |                    |
|                                              | Study dates                                                                                                                                                                                                                                                       |                    |
| <b>OUTCOME(S) TO BE PREDICTED</b>            | Definition and method for measurement of outcome                                                                                                                                                                                                                  |                    |
|                                              | Was the same outcome definition (and method for measurement) used in all patients?                                                                                                                                                                                |                    |
|                                              | Type of outcome (e.g., single or combined endpoints)                                                                                                                                                                                                              |                    |
|                                              | Was the outcome assessed without knowledge of the candidate predictors (i.e., blinded)?                                                                                                                                                                           |                    |
|                                              | Were candidate predictors part of the outcome (e.g., in panel or consensus diagnosis)?                                                                                                                                                                            |                    |
|                                              | Time of outcome occurrence or summary of duration of follow-up                                                                                                                                                                                                    |                    |
| <b>CANDIDATE PREDICTORS (OR INDEX TESTS)</b> | Number and type of predictors (e.g., demographics, patient history, physical examination, additional testing, disease characteristics)                                                                                                                            |                    |
|                                              | Definition and method for measurement of candidate predictors                                                                                                                                                                                                     |                    |
|                                              | Timing of predictor measurement (e.g., at patient presentation, at diagnosis, at treatment initiation)                                                                                                                                                            |                    |
|                                              | Were predictors assessed blinded for outcome, and for each other (if relevant)?                                                                                                                                                                                   |                    |
|                                              | Handling of predictors in the modelling (e.g., continuous, linear, non-linear transformations or categorised)                                                                                                                                                     |                    |
| <b>SAMPLE SIZE</b>                           | Number of participants and number of outcomes/events                                                                                                                                                                                                              |                    |
|                                              | Number of outcomes/events in relation to the number of candidate predictors (Events Per Variable)                                                                                                                                                                 |                    |
| <b>MISSING DATA</b>                          | Number of participants with any missing value (include predictors and outcomes)                                                                                                                                                                                   |                    |
|                                              | Number of participants with missing data for each predictor                                                                                                                                                                                                       |                    |
|                                              | Handling of missing data (e.g., complete-case analysis, imputation, or other methods)                                                                                                                                                                             |                    |
| <b>MODEL DEVELOPMENT</b>                     | Modelling method (e.g., logistic, survival, neural network, or machine learning techniques)                                                                                                                                                                       |                    |
|                                              | Modelling assumptions satisfied                                                                                                                                                                                                                                   |                    |
|                                              | Method for selection of predictors <b>for inclusion</b> in multivariable modelling (e.g., all candidate predictors, pre-selection based on unadjusted association with the outcome)                                                                               |                    |
|                                              | Method for selection of predictors <b>during multivariable modelling</b> (e.g., full model approach, backward or forward selection) and criteria used (e.g., p-value, Akaike Information Criterion)                                                               |                    |
|                                              | Shrinkage of predictor weights or regression coefficients (e.g., no shrinkage, uniform shrinkage, penalized estimation)                                                                                                                                           |                    |
| <b>MODEL PERFORMANCE</b>                     | Calibration (calibration plot, calibration slope, Hosmer-Lemeshow test) and Discrimination (C-statistic, D-statistic, log-rank) measures with confidence intervals                                                                                                |                    |
|                                              | Classification measures (e.g., sensitivity, specificity, predictive values, net reclassification improvement) and whether a-priori cut points were used                                                                                                           |                    |
| <b>MODEL EVALUATION</b>                      | Method used for testing model performance: development dataset only (random split of data, resampling methods e.g. bootstrap or cross-validation, none) or separate external validation (e.g. temporal, geographical, different setting, different investigators) |                    |
|                                              | In case of poor validation, whether model was adjusted or updated (e.g., intercept recalibrated, predictor effects adjusted, or new predictors added)                                                                                                             |                    |
| <b>RESULTS</b>                               | Final and other multivariable models (e.g., basic, extended, simplified) presented, including predictor weights or regression coefficients, intercept, baseline survival, model performance measures (with standard errors or confidence intervals)               |                    |
|                                              | Any alternative presentation of the final prediction models, e.g., sum score, nomogram, score chart, predictions for specific risk subgroups with performance                                                                                                     |                    |
|                                              | Comparison of the distribution of predictors (including missing data) for development and validation datasets                                                                                                                                                     |                    |
| <b>INTERPRETATION AND DISCUSSION</b>         | Interpretation of presented models (confirmatory, i.e., model useful for practice versus exploratory, i.e., more research needed)                                                                                                                                 |                    |
|                                              | Comparison with other studies, discussion of generalizability, strengths and limitations.                                                                                                                                                                         |                    |
