# Supplementary material for: Unlocking the Potential of Circulating miRNAs in the Breast Cancer Neoadjuvant Setting: A Systematic Review and Meta-Analysis
Source: MDPI journal article supplement (doi:10.3390/cancers15133424), 2023-06-30
Supplement: s1 [file s1]

**Supplementary Table1:** Risk of bias and applicability assessment

| Author, Year     | Risk of Bias    |               |            |             | Applicability   |               |            | Overall      |               |
|------------------|-----------------|---------------|------------|-------------|-----------------|---------------|------------|--------------|---------------|
|                  | 1. Participants | 2. Predictors | 3. Outcome | 4. Analysis | 1. Participants | 2. Predictors | 3. Outcome | Risk of Bias | Applicability |
| Li , 2014        | +               | +             | +          | +           | +               | +             | +          | +            | +             |
| Liu(a), 2017     | +               | +             | +          | +           | +               | +             | +          | +            | +             |
| Liu(b), 2017     | +               | +             | +          | +           | +               | +             | +          | +            | +             |
| Stevic, 2018     | +               | +             | +          | +           | +               | +             | +          | +            | +             |
| Wang, 2018       | +               | +             | +          | -           | +               | +             | +          | -            | +             |
| Zhu, 2018        | +               | +             | +          | +           | +               | +             | +          | +            | +             |
| Liu, 2019        | +               | +             | +          | +           | +               | +             | +          | +            | +             |
| Di Cosimo , 2020 | +               | +             | +          | ?           | +               | +             | +          | ?            | +             |
| McGuire, 2020    | +               | +             | +          | -           | +               | +             | +          | -            | +             |
| Zhang(a), 2020   | +               | +             | +          | +           | +               | +             | +          | +            | +             |
| Zhang(b), 2020   | +               | +             | +          | +           | +               | +             | +          | +            | +             |
| Zhang, 2021      | +               | +             | +          | +           | +               | +             | +          | +            | +             |
| Baldasici, 2022  | ?               | ?             | ?          | ?           | ?               | ?             | ?          | ?            | ?             |
| Li, 2022         | ?               | ?             | ?          | ?           | ?               | ?             | ?          | ?            | ?             |
| Sadovska, 2022   | +               | +             | +          | ?           | +               | +             | +          | ?            | +             |
