# Supplementary figures and images for: Unlocking the Potential of Circulating miRNAs in the Breast Cancer Neoadjuvant Setting: A Systematic Review and Meta-Analysis
Source: MDPI journal article supplement (doi:10.3390/cancers15133424), 2023-06-30

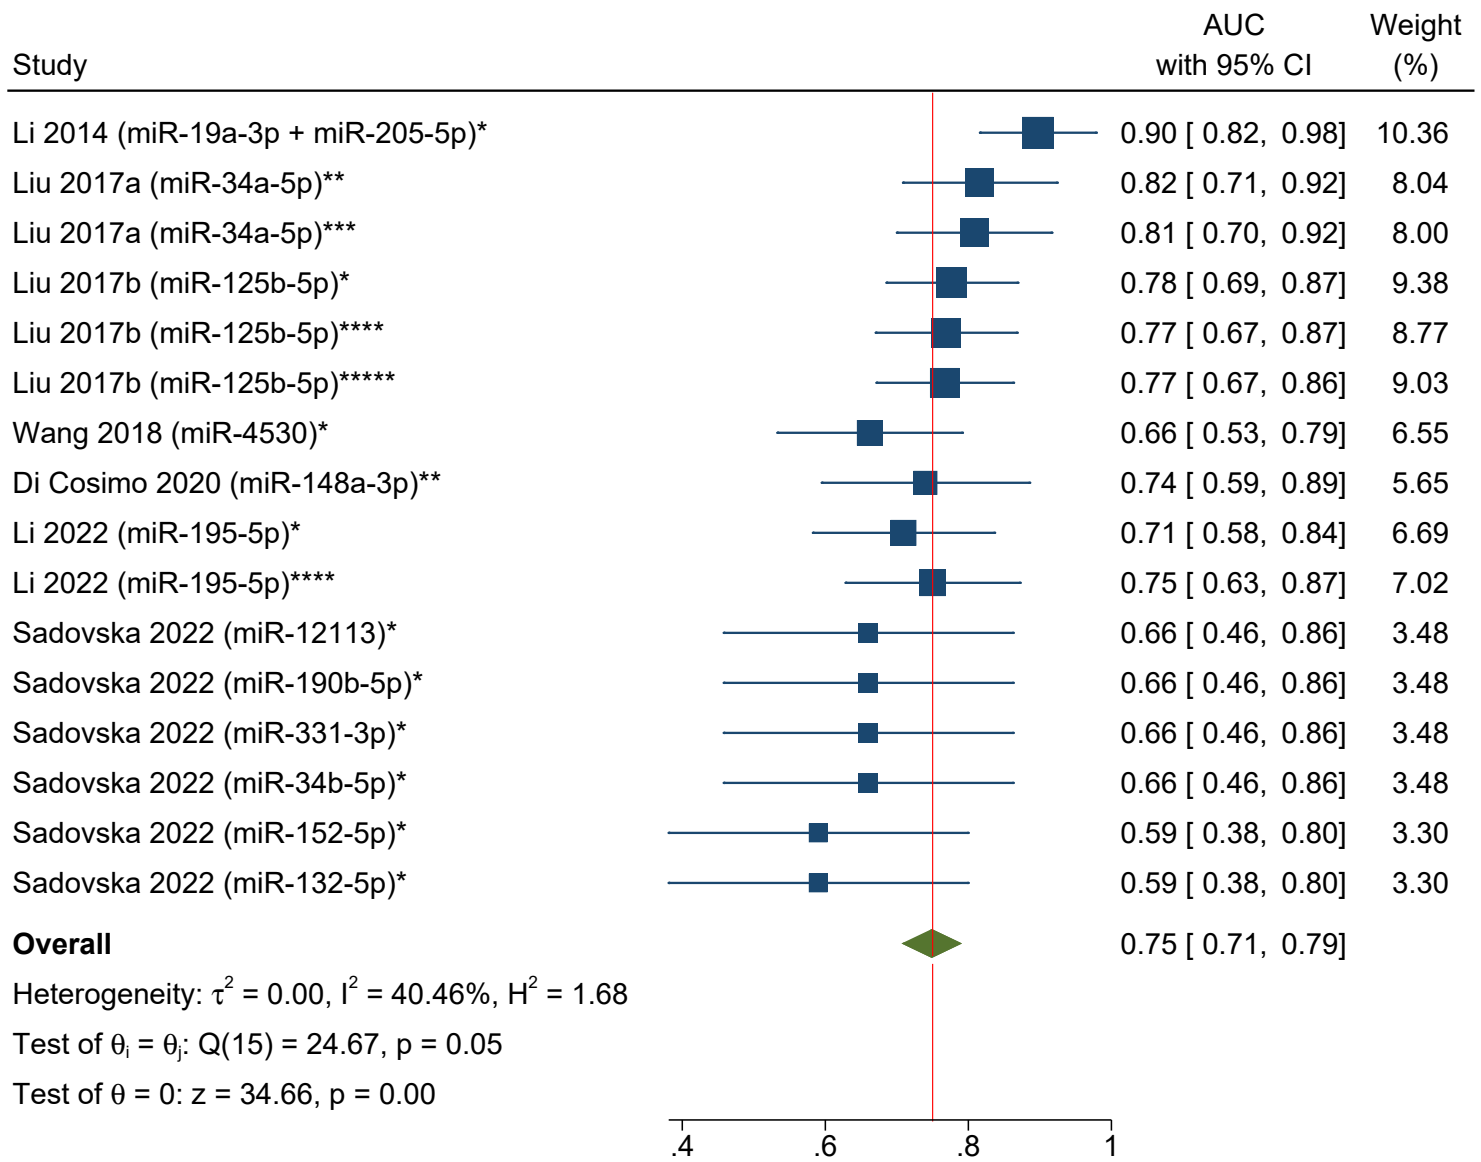

Supplement: s1 [file s1]

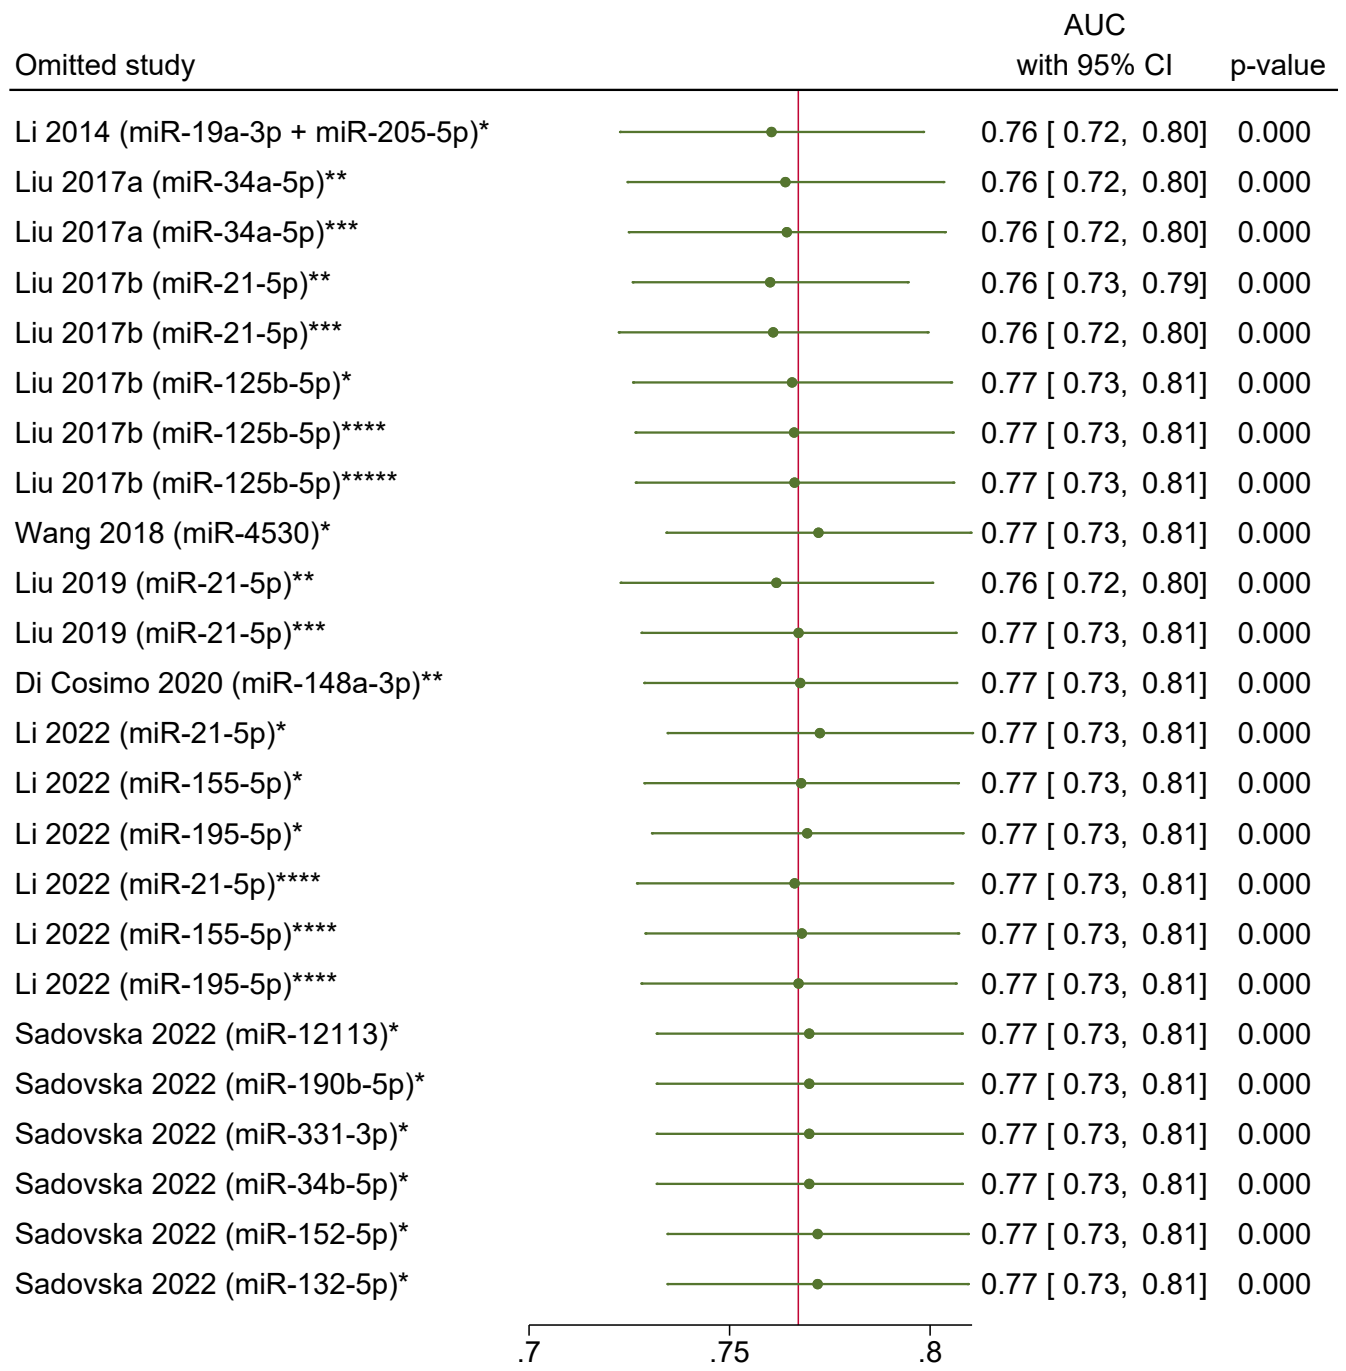

Random-effects REML model

Supplement: s1 [file s1]

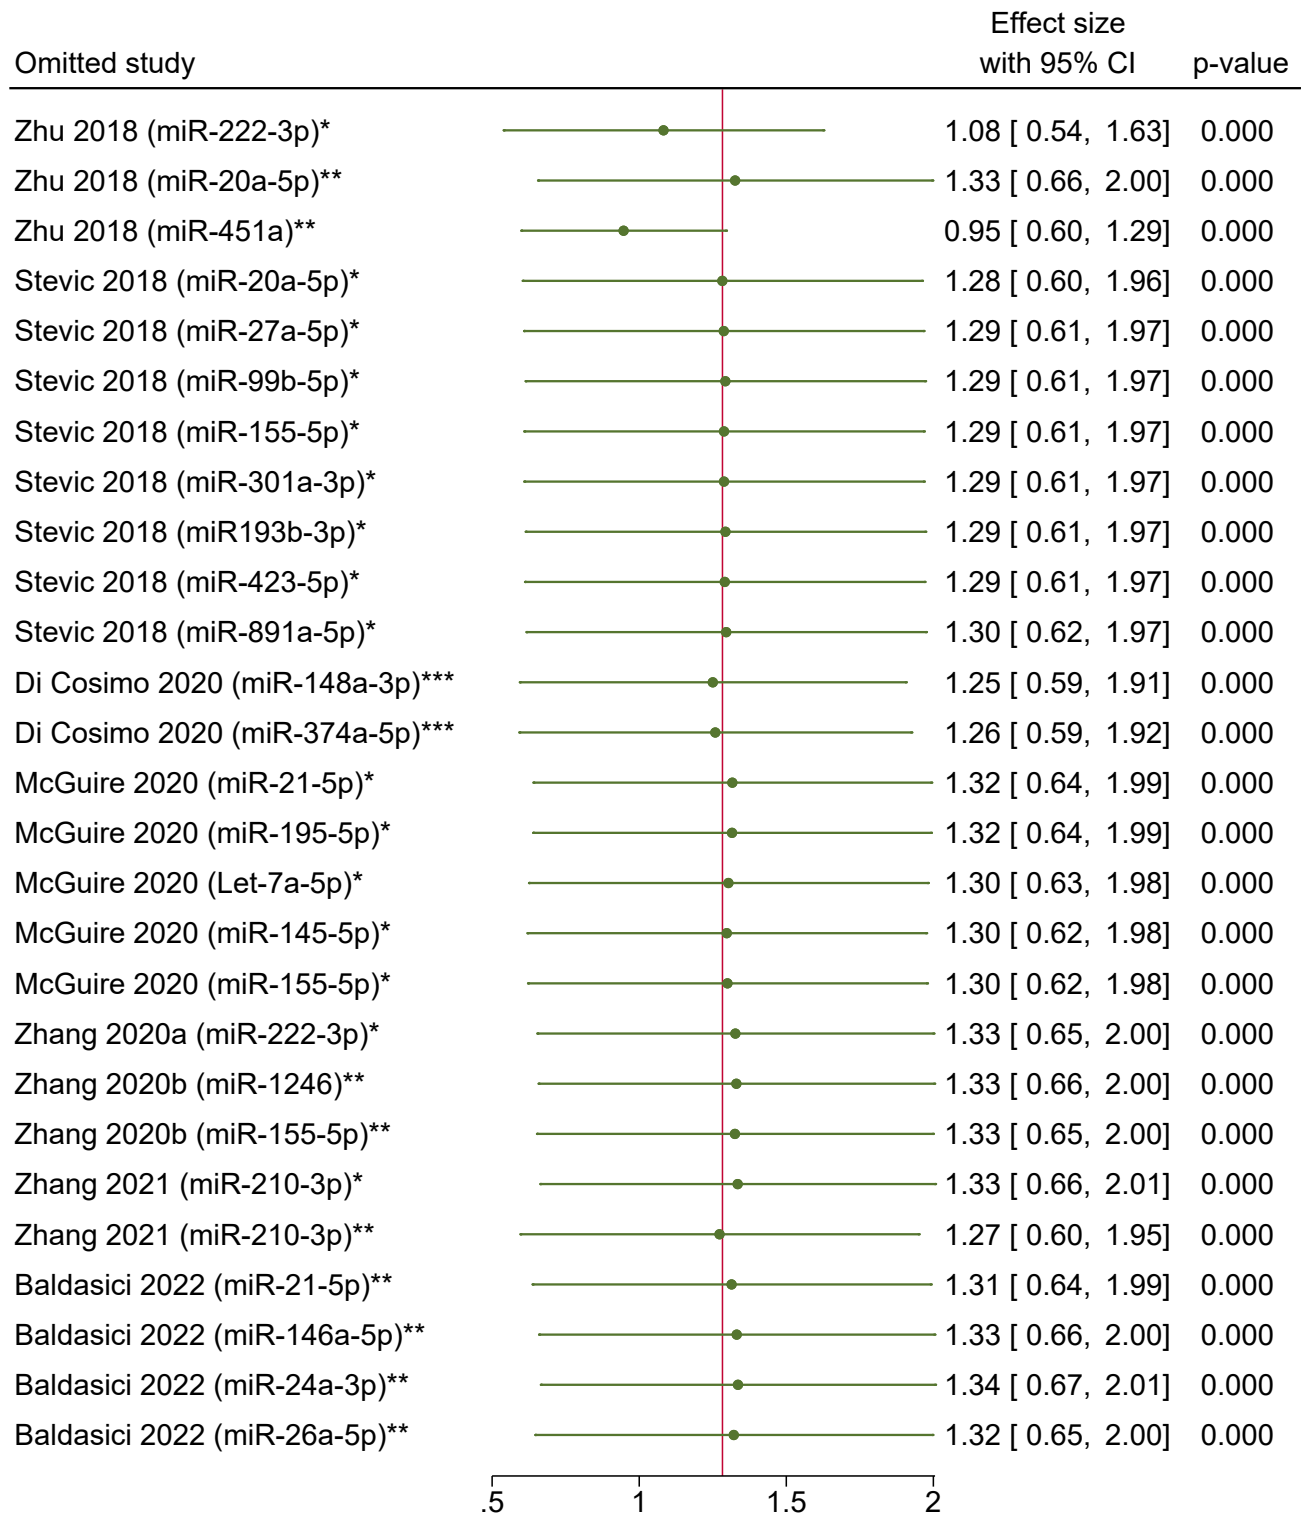

Random-effects REML model

Supplement: s1 [file s1]

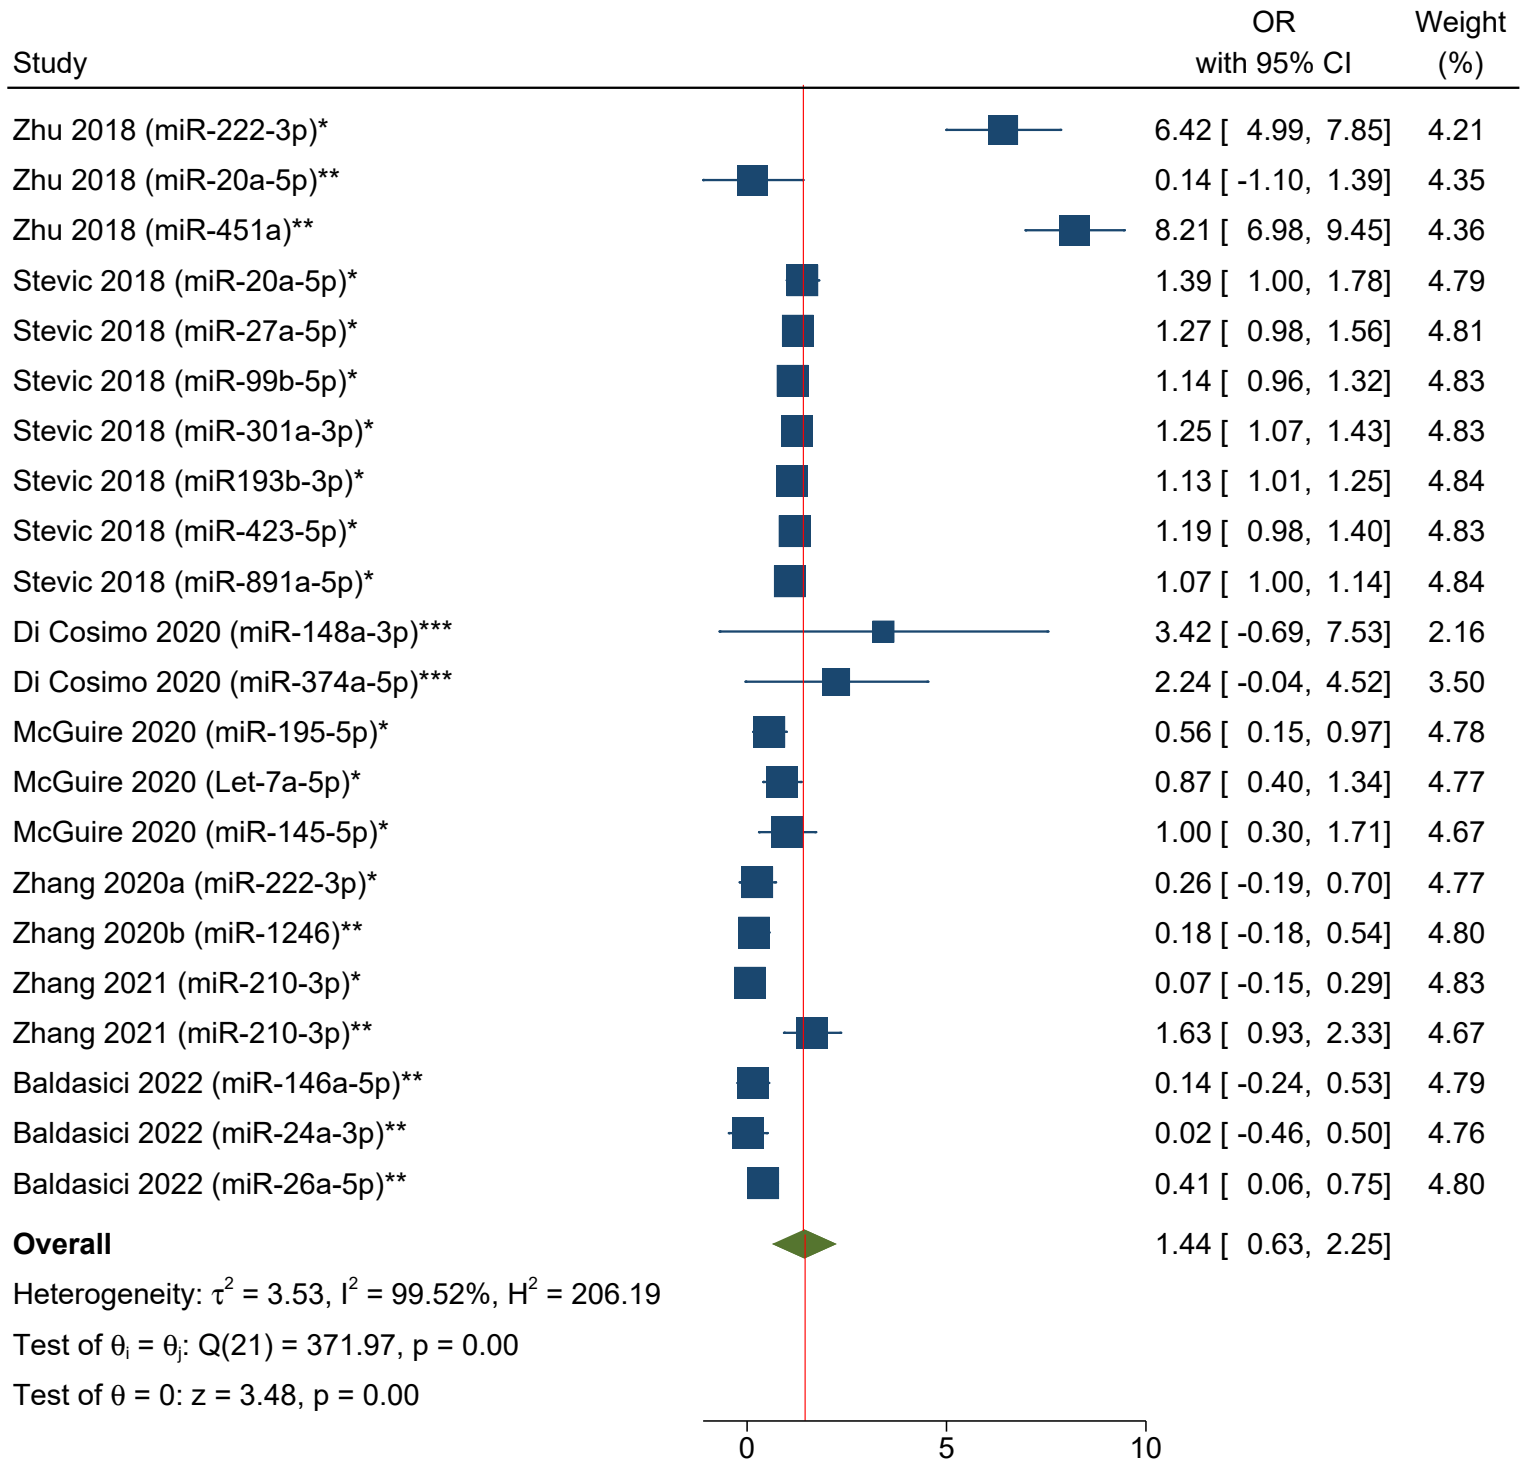

Random-effects REML model

Supplement: s1 [file s1]
